# Supplementary material for: Shell-adjustable hollow ‘soft’ silica spheres as a support for gold nanoparticles
Source: Royal Society of Chemistry journal article supplement (doi:10.1039/c3ta01572f), 2013-01-01
Supplement: c3ta01572f.pdf [file c3ta01572f.pdf]

## Supporting Information

# Shell-adjustable Hollow ‘Soft’ Silica Spheres as a Support for Gold Nanoparticles

*Qingmin Ji,\* Jonathan P. Hill, and Katsuhiko Ariga\**

*World Premier International (WPI) Research Center for Materials Nanoarchitectonics (MANA), National Institute For Materials Science (NIMS), 1-1 Namiki, Tsukuba, 305-0044, Japan.*

*JST, CREST, Gobancho, Chiyoda-ku, Tokyo 102-0076.*

\*ARIGA.Katsuhiko@nims.go.jp

\*JI.Qingmin@nims.go.jp

## Additional Data

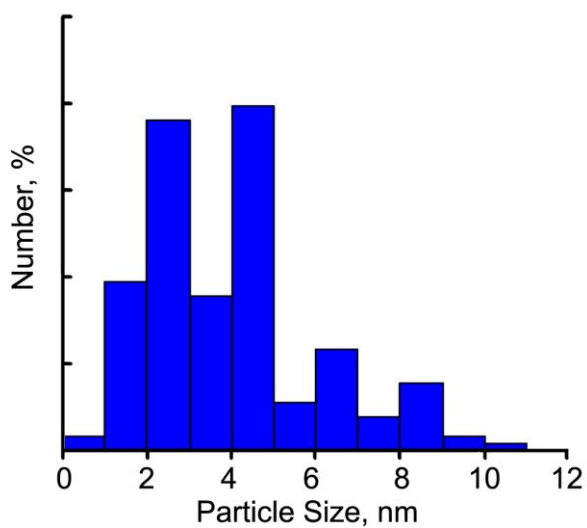

**Figure S1.** The distribution of Au nanoparticles in the Au-FlaSS1 with Au/Si mass ratio of 0.02.

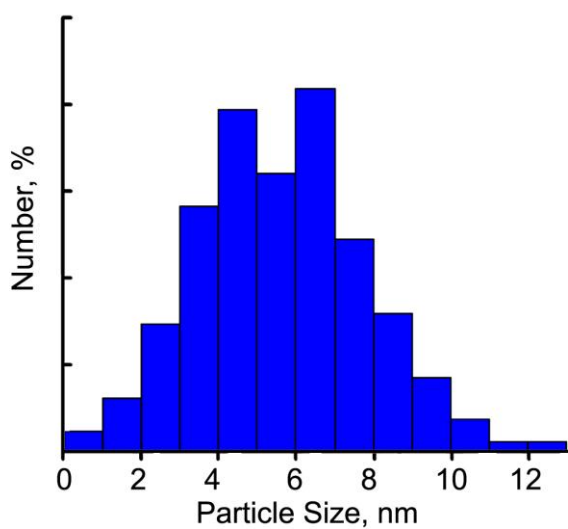

**Figure S2.** The distribution of Au nanoparticles in the Au-FlaSS2 with Au/Si mass ratio of 0.07.

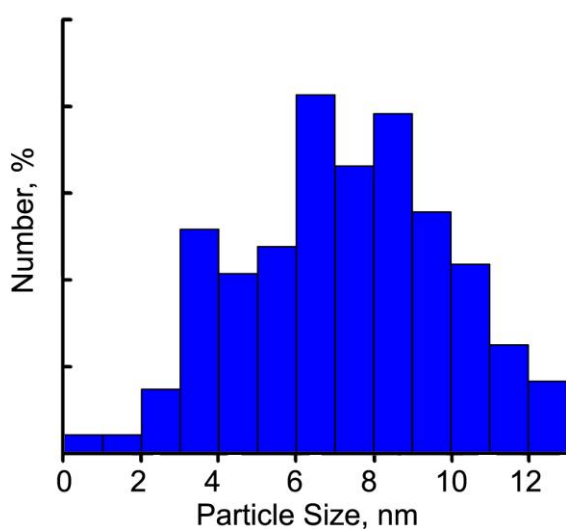

**Figure S3.** The distribution of Au nanoparticles in the Au-FlaSS3 with Au/Si mass ratio of 0.21.

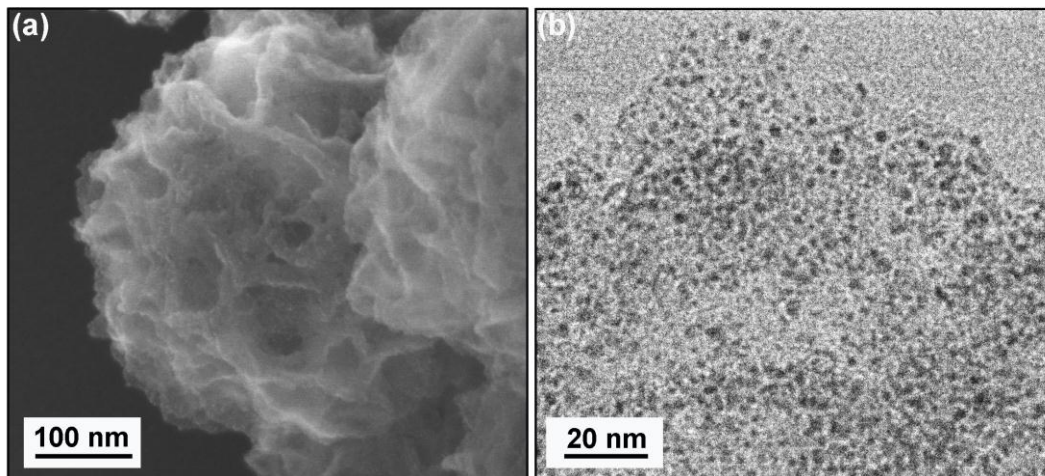

**Figure S4.** The SEM (a) and TEM (b) images of the Au-FlaSS2 after the modification by 1wt% 3-mercaptopropyl-trimethoxysilane solution. The TEM image showed the gold particles on the surface of the flakes in the shell.

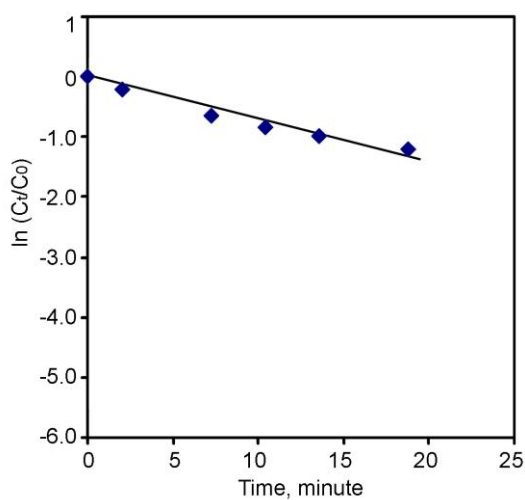

**Figure S5.** The relationship between  $\ln(C_t/C_0)$  and reaction time ( $t$ ) for the case of the Au-FlaSS2 after the modification by 1wt% 3-mercaptopropyl-trimethoxysilane solution. The rate constants  $k$  for the reduction of 4-nitrophenol is calculated to be  $0.036 \text{ min}^{-1}$ , which is much lower than the value of Au-FlaSS2 without modification. The coverage of thiol groups on the surfaces of Au particles blocked the active site and resulted in the decrease of catalysis efficiency.
